# Supplementary material for: National Trends in the Antipsychotic Treatment of Psychiatric Outpatients With Anxiety Disorders
Source: Atypon-hosted journal article supplement (doi:10.1176/appi.ajp.2011.11010087), 2011-07-29
Supplement: ajp_168_10_1057_01.pdf [file ajp_168_10_1057_01.pdf]

## Appendix: Medication class definitions

| Medication class              | Psychotropic agents included                                                                                                                                                                                                                                                                                                                 |
|-------------------------------|----------------------------------------------------------------------------------------------------------------------------------------------------------------------------------------------------------------------------------------------------------------------------------------------------------------------------------------------|
| Antipsychotics <sup>a</sup>   | aripiprazole, chlorpromazine, clozapine, fluphenazine, haloperidol, loxapine, mesoridazine, molindone, olanzapine, perphenazine, pimozide, quetiapine, risperidone, thioridazine, thiothixene, trifluoperazine, ziprasidone                                                                                                                  |
| First generation              | chlorpromazine, fluphenazine, haloperidol, loxapine, mesoridazine, molindone, perphenazine, pimozide, thioridazine, thiothixene, trifluoperazine                                                                                                                                                                                             |
| Second generation             | aripiprazole, clozapine, olanzapine, quetiapine, risperidone, ziprasidone                                                                                                                                                                                                                                                                    |
| Antidepressants               | amitriptyline, amoxapine, bupropion, citalopram, clomipramine, desipramine, doxepin, duloxetine, escitalopram, fluoxetine, fluvoxamine, imipramine, isocarboxazid, maprotiline, mirtazapine, nefazodone, nortriptyline, paroxetine, phenelzine, protriptyline, selegiline, sertraline, tranylcypromine, trazodone, trimipramine, venlafaxine |
| Sedative-hypnotics            | alprazolam, butabarbital, chloralhydrate, chlordiazepoxide, chlorazepate, clonazepam, diazepam, diphenhydramine, esczopiclone, estazolam, flurazepam, hydroxyzine, lorazepam, meprobamate, nitrazepam, oxazepam, phenobarbital, <sup>b</sup> secobarbital, temazepam, triazolam, zaleplon, zolpidem                                          |
| Mood stabilizers <sup>c</sup> | carbamazepine, lamotrigine, lithium, valproate/divalproex                                                                                                                                                                                                                                                                                    |

<sup>a</sup> Prochlorperazine, promethazine, and droperidol, which are primarily used for non-psychiatric indications, were not included

<sup>b</sup> Phenobarbital was included as a sedative-hypnotic only if the patient did not receive a seizure disorder diagnosis

<sup>c</sup> Carbamazepine, lamotrigine, valproate/divalproex were included as mood stabilizers only if the patient did not have a seizure disorder diagnosis
